# Supplementary material
Source: HighWire-hosted journal article supplement (https://cmaj.ca/highwire/filestream/147222/field_highwire_adjunct_files/0/220919-res-1-at.pdf)
Supplement: 220919-res-1-at.pdf [file 220919-res-1-at.pdf]

## APPENDIX 1

### SUPPLEMENTAL TABLES

**Supplemental Table 1. Description of databases at ICES used to ascertain study variables**

| Database                                                                       | Description                                                                                                   | Relevance                                                                                                                                                    |
|--------------------------------------------------------------------------------|---------------------------------------------------------------------------------------------------------------|--------------------------------------------------------------------------------------------------------------------------------------------------------------|
| Registered Persons Database (RPDB)                                             | Records all demographic and vital statistics of all individuals covered by the Ontario Health Insurance Plan. | Used to capture vital status and study sociodemographic characteristics of patients, including age, sex, neighbourhood income quintile, and rural residence. |
| Immigrant, Refugees, and Citizenship Canada Permanent Residents Database (CIC) | Provides information on permanent and temporary residents, as well as immigration and citizenship programs.   | Used to determine whether a patient was a recent immigrant to Canada, captured by landing date.                                                              |
| Ontario Health Insurance Plan Database (OHIP)                                  | Records data on physician service claims, including diagnostic codes.                                         | Used for cohort identification (palliative care physician home visits), and for identification of comorbidities.                                             |
| Ontario Drug Benefit Plan Database (ODB)                                       | Captures information on drug prescriptions filled for individuals 65 and older.                               | Used to identify anticoagulant and other prescription medication use.                                                                                        |
| Canadian Institute for Health Information Discharge Abstract Database (DAD)    | Records data from hospitalizations in acute care hospitals in Ontario.                                        | Used to study indications for anticoagulation, comorbidities, subsequent thrombotic/bleeding events, and location of death                                   |
| National Ambulatory Care Reporting System Database (NACRS)                     | Records data on ambulatory and emergency department visits.                                                   | Used to study indications for anticoagulation, comorbidities, subsequent thrombotic/bleeding events, and location of death.                                  |
| Same Day Surgery Database (SDS)                                                | Records information from same day surgeries/procedures.                                                       | Used to identify comorbidities and location of death.                                                                                                        |
| Continuing Care Reporting System Database (CCRS)                               | Records information from continuing care facilities.                                                          | Used in conjunction with other databases to ascertain location of death.                                                                                     |
| Ministry of Health and Long-Term Care Institution Database (INST)              | Records information from long-term care facilities.                                                           | Used in conjunction with other databases to ascertain location of death.                                                                                     |
| National Rehabilitation Reporting System Database (NRS)                        | Records information from rehabilitation facilities.                                                           | Used in conjunction with other databases to ascertain location of death.                                                                                     |
| Ontario Mental Health Reporting System Database                                | Records information from mental health facilities.                                                            | Used in conjunction with other databases to ascertain location of death.                                                                                     |
| ICES Physician Database (IPDB) and Corporate Provider Database (CPDB)          | Records demographic, training, and practice characteristics of physicians in Ontario.                         | Used to study characteristics of palliative care physicians, including age, sex, graduation year, and training/specialty.                                    |
| Drug Identification Number (DIN) File (IVQIA Solutions Canada Inc.)            | Contains information on drug and product names in the ODB formulary                                           | Used to identify an exhaustive list of prescription medications dispensed                                                                                    |

Appendix 1, as supplied by the authors. Appendix to: Chin-Yee N, Gomes T, Tanuseputro P, et al. Anticoagulant use and associated outcomes in older patients receiving home palliative care: a retrospective cohort study. *CMAJ* 2022. doi: 10.1503/cmaj.220919.

**Supplemental Table 2. Data sources and description of sociodemographic, clinical and health care variables**

| Variable                                     | Source                | Description                                                                                                                                                                                                                                                                                           | References |
|----------------------------------------------|-----------------------|-------------------------------------------------------------------------------------------------------------------------------------------------------------------------------------------------------------------------------------------------------------------------------------------------------|------------|
| <i>Sociodemographic variables</i>            |                       |                                                                                                                                                                                                                                                                                                       |            |
| Age                                          | RPDB                  |                                                                                                                                                                                                                                                                                                       |            |
| Sex                                          | RPDB                  | SEX                                                                                                                                                                                                                                                                                                   |            |
| Neighbourhood income quintile                | RPDB                  | INCQUINT variable (nearest census-based neighbourhood income quintile)                                                                                                                                                                                                                                |            |
| Rural residence                              | RPDB                  | RURAL flag: %getdemo macro                                                                                                                                                                                                                                                                            |            |
| Immigrant status                             | CIC                   | 1. Recent immigrant: LANDING_DATE within 10 years prior to index date.<br>2. Long-standing resident: all others                                                                                                                                                                                       | (1,2)      |
| Vital status                                 | RPDB                  | DTHDATE                                                                                                                                                                                                                                                                                               | (3)        |
| <i>Diagnostic and procedural variables</i>   |                       |                                                                                                                                                                                                                                                                                                       |            |
| Atrial fibrillation                          | DAD, NACRS            | ICD-9: 4273<br>ICD-10-CA: I48<br>Look-back window: 10 years*                                                                                                                                                                                                                                          | (4-7)      |
| Venous thromboembolism                       | DAD, NACRS            | ICD-10-CA:<br>• Deep vein thrombosis: I801, I802, I803, I808, I809, I81, I820, I821, I822, I823, I828, I829<br>• Pulmonary embolism: I260, I269<br>Look-back window: 5 years*                                                                                                                         | (4-7)      |
| Mechanical heart valve                       | DAD                   | CCP: 4721, 4723, 4725, 4727, 4729<br>CCI: 1HS780GPFE, 1HS80LAFE, 1HS90LACF, 1HT80GPFE, 1HT80LAFE, 1HT90LACF, 1HU80GPFE, 1HU80LAFE, 1HU90LACF, 1HU90PNXXK, 1HU90PNCF, 1HV80GPFE, 1HV80LAFE, 1HV90LACF, 1HV90LACFA, 1HV90LACFL, 1HV90LACFN, 1HV90WJCFN<br>Look-back window: 10 years*                   | (4-7)      |
| Cancer                                       | DAD, NACRS, OHIP      | Prior diagnosis of cancer (any) identified using HSPRN macro for the presence of 18 chronic conditions.<br>Look-back window: 10 years*                                                                                                                                                                | (8-10)     |
| Congestive heart failure                     | DAD, NACRS, OHIP      | Prior diagnosis of congestive heart failure identified using HSPRN macro for the presence of 18 chronic conditions.<br>Look-back window: 10 years*                                                                                                                                                    | (8-10)     |
| Hypertension                                 | DAD, NACRS, OHIP      | Prior diagnosis of hypertension identified using HSPRN macro for the presence of 18 chronic conditions.<br>Look-back window: 10 years*                                                                                                                                                                | (8-10)     |
| Diabetes mellitus                            | DAD, NACRS, OHIP      | Prior diagnosis of diabetes mellitus identified using HSPRN macro for the presence of 18 chronic conditions.<br>Look-back window: 10 years*                                                                                                                                                           | (8-10)     |
| Ischemic stroke or transient ischemic attack | DAD, NACRS            | ICD-10-CA:<br>• Ischemic stroke: I630, I631, I632, I633, I634, I635, I636, I638, I639,<br>• TIA: G450, G451, G452, G453, G454, G458, G459                                                                                                                                                             | (4-7)      |
| Coronary artery disease                      | DAD, NACRS, OHIP      | Myocardial infarction:<br>• ICD-10-CA: I21, I22<br>All other coronary artery disease:<br>• ICD-10-CA: I22, I23, I24, I25, Z955, Z958, Z959, R931, T822<br>• CCI: 1IJ54, 1IJ57, 1IJ50, 1IJ76<br>• OHIP: R741, R742, R743, G298, E646, E651, E652, E654, E655, G262, Z434<br>Look-back window: 5 years* | (4,6,11)   |
| Peripheral arterial disease                  | DAD, NACRS, SDS, OHIP | • ICD-10-CA: I700, I702, I708, I709, I731, I738, I739, K551                                                                                                                                                                                                                                           | (4,6,11)   |

Appendix 1, as supplied by the authors. Appendix to: Chin-Yee N, Gomes T, Tanuseputro P, et al. Anticoagulant use and associated outcomes in older patients receiving home palliative care: a retrospective cohort study. *CMAJ* 2022. doi: 10.1503/cmaj.220919.

|                                                              |                       |                                                                                                                                                                                                                                                                                                                                                                                                                                                                                                                                                                                                                                                                                                                                                                                                                     |         |
|--------------------------------------------------------------|-----------------------|---------------------------------------------------------------------------------------------------------------------------------------------------------------------------------------------------------------------------------------------------------------------------------------------------------------------------------------------------------------------------------------------------------------------------------------------------------------------------------------------------------------------------------------------------------------------------------------------------------------------------------------------------------------------------------------------------------------------------------------------------------------------------------------------------------------------|---------|
|                                                              |                       | <ul style="list-style-type: none"> <li>CCI: 1KA76, 1KA50, 1KE76, 1KG50, 1KG57, 1KG76MI, 1KG87, 1IA87LA, 1IB87LA, 1IC87LA, 1ID87, 1KA87LA, 1KE57</li> <li>OHIP: R787, R780, R797, R804, R809, R875, R815, R936, R783, R784, R785, E626, R814, R786, R937, R860, R861, R855, R856, R933, R934, R791, E672, R794, R813, R867, E649</li> </ul>                                                                                                                                                                                                                                                                                                                                                                                                                                                                          |         |
|                                                              |                       | Look-back window: 5 years*                                                                                                                                                                                                                                                                                                                                                                                                                                                                                                                                                                                                                                                                                                                                                                                          |         |
| Renal disease                                                | DAD, NACRS, OHIP      | Prior diagnosis of renal disease identified using HSPRN macro for the presence of 18 chronic conditions.                                                                                                                                                                                                                                                                                                                                                                                                                                                                                                                                                                                                                                                                                                            | (8–10)  |
|                                                              |                       | Look-back window: 10 years*                                                                                                                                                                                                                                                                                                                                                                                                                                                                                                                                                                                                                                                                                                                                                                                         |         |
| Liver disease                                                | DAD, NACRS            | ICD-10-CA: <ul style="list-style-type: none"> <li>Mild liver disease: B18x, K700-K703, K709, K713-K715, K717, K73x, K74x, K760, K762-K764, K768, K769, Z944</li> <li>Moderate or severe liver disease: I850, I859, I864, I982, K704, K711, K721, K729, K765, K766, K767</li> </ul>                                                                                                                                                                                                                                                                                                                                                                                                                                                                                                                                  | (12)    |
|                                                              |                       | Look-back window: 5 years*                                                                                                                                                                                                                                                                                                                                                                                                                                                                                                                                                                                                                                                                                                                                                                                          |         |
| Bleeding events                                              | DAD, NACRS            | ICD-10-CA: <ul style="list-style-type: none"> <li>Intracranial: I600, I601, I602, I603, I604, I605, I606, I607, I608, I609, I610, I611, I612, I613, I614, I615, I616, I618, I619, I620, I621, I629</li> <li>Upper gastrointestinal: I850, I982, I983, K2210, K2212, K2214, K2216, K226, K250, K252, K254, K256, K260, K262, K264, K266, K270, K272, K274, K276, K280, K282, K284, K286, K290, K3180, K6380, K920, K921, K922</li> <li>Lower gastrointestinal: K5520, K625</li> <li>Other (primarily genitourinary and respiratory): D683, H113, H313, H356, H431, H450, J942, J9500, K661, M2500, M2501, M2502, M2503, M2504, M2505, M2506, M2507, M2508, M2509, N020, N021, N022, N023, N024, N025, N026, N027, N028, N029, N421, N938, N939, N950, R040, R041, R042, R048, R049, R310, R311, R318, R58</li> </ul> | (4–7)   |
|                                                              |                       | Look-back window: 5 years*                                                                                                                                                                                                                                                                                                                                                                                                                                                                                                                                                                                                                                                                                                                                                                                          |         |
| Dementia                                                     | DAD, NACRS, OHIP      | Prior diagnosis of renal disease identified using HSPRN macro for the presence of 18 chronic conditions.                                                                                                                                                                                                                                                                                                                                                                                                                                                                                                                                                                                                                                                                                                            | (8–10)  |
|                                                              |                       | Look-back window: 10 years*                                                                                                                                                                                                                                                                                                                                                                                                                                                                                                                                                                                                                                                                                                                                                                                         |         |
| COPD                                                         | DAD, NACRS, OHIP      | Prior diagnosis of COPD identified using HSPRN macro for the presence of 18 chronic conditions.                                                                                                                                                                                                                                                                                                                                                                                                                                                                                                                                                                                                                                                                                                                     | (8–10)  |
|                                                              |                       | Look-back window: 10 years*                                                                                                                                                                                                                                                                                                                                                                                                                                                                                                                                                                                                                                                                                                                                                                                         |         |
| Comorbidity                                                  | DAD                   | Charlson Comorbidity Index: %getcharlson macro                                                                                                                                                                                                                                                                                                                                                                                                                                                                                                                                                                                                                                                                                                                                                                      | (12,13) |
|                                                              |                       | Look-back window: 10 years*                                                                                                                                                                                                                                                                                                                                                                                                                                                                                                                                                                                                                                                                                                                                                                                         |         |
| <i>Health care variables</i>                                 |                       |                                                                                                                                                                                                                                                                                                                                                                                                                                                                                                                                                                                                                                                                                                                                                                                                                     |         |
| Palliative care physician home visit (cohort identification) | OHIP                  | OHIP <i>FEEOCODE</i> (any of): <ul style="list-style-type: none"> <li>B966 (travel premium)</li> <li>B998 (home visit from 07:00-24:00)</li> <li>B997 (home visit from 24:00-07:00)</li> </ul>                                                                                                                                                                                                                                                                                                                                                                                                                                                                                                                                                                                                                      | (14–17) |
| Physician characteristics                                    | CPDB, IPDB, OHIP, ODB | Age: IPDB <i>BDATE</i><br>Sex: IPDB <i>SEX</i><br>Graduation year: IPDB <i>GRADYEAR</i><br>International medical graduate: IPDB <i>IMG</i><br>Primary certification (base specialty): IPDB <i>MAINSPECIALTY</i><br>1. Family medicine                                                                                                                                                                                                                                                                                                                                                                                                                                                                                                                                                                               | (16,18) |

---

2. Specialist: medical or surgical

Rural practice: IPDB *RURAL*

Palliative care specialist: Barbera et al. algorithm employing OHIP claims

1. Specialist:  $\geq 10\%$  of all service claims are for palliative care services.
2. Generalist:  $< 10\%$  of all service claims are for palliative care services.

---

|                   |                                               |                                                                                                                                                                                                                                                                                                                                                                                                                                                                                    |         |
|-------------------|-----------------------------------------------|------------------------------------------------------------------------------------------------------------------------------------------------------------------------------------------------------------------------------------------------------------------------------------------------------------------------------------------------------------------------------------------------------------------------------------------------------------------------------------|---------|
| Location of death | RPDB, DAD, NACRS, CCRS, SDS, NRS, OMHRS, INST | <i>%locationofdeath</i> macro<br>1. Death in a health care facility, which includes: <ol style="list-style-type: none"><li>a. Acute hospital (DAD)</li><li>b. Emergency department (NACRS)</li><li>c. Complex continuing care (CCRS <i>FACILITY_TYPE_CODE</i> = 3)</li><li>d. Same day surgery (SDS)</li><li>e. Inpatient rehabilitation facility (NRS)</li><li>f. Inpatient mental health facility (OMHRS)</li><li>g. Long-Term Care (CCRS <i>FACILITY_TYPE_CODE</i>=4)</li></ol> | (15,17) |
|                   |                                               | 2. Death at home: death not documented at any of the above facilities                                                                                                                                                                                                                                                                                                                                                                                                              |         |

---

\*For baseline diagnostic and procedural variables, the look-back period was from the date of the index anticoagulant claim—not the index date. The index anticoagulant claim was defined as the most recent active (remaining supply at index date) anticoagulant claim dispensed prior to or on the index date.

Abbreviations:

CCI, Canadian Classification of Health Interventions

CCP, Canadian Classification of Diagnostic, Therapeutic and Surgical Procedures

CCRS, Continuing Care Reporting System Database

CIC, Immigrant, Refugees, and Citizenship Canada Permanent Residents Database

CPDB, Corporate Provider Database

DAD, Canadian Institute for Health Information Discharge Abstract Database

HSPRN, Health System Performance Research Network

ICD-9, International Statistical Classification of Diseases and Related Health Problems, 9<sup>th</sup> Revision.

ICD-10-CA, International Statistical Classification of Diseases and Related Health Problems, 10<sup>th</sup> Revision, Canada.

INST, Information on institutions from the Ontario Ministry of Health and Long-Term Care

IPDB, ICES Physician Database

NACRS, National Ambulatory Care Reporting System Database

NRS, National Rehabilitation Reporting System Database

ODB, Ontario Drug Benefit Plan Database

OHIP, Ontario Health Insurance Plan Database

OMHRS, Ontario Mental Health Reporting System Database

RPDB, Registered Persons Database

SDS, Same Day Surgery Database

**Supplemental Table 3. List and classification of study medications\***

| <b>Class</b>                                  | <b>Subclassification<sup>†</sup></b> | <b>Drug</b>                                          |
|-----------------------------------------------|--------------------------------------|------------------------------------------------------|
| Anticoagulants                                | Vitamin K antagonist                 | Warfarin                                             |
|                                               | Direct oral anticoagulants           | Apixaban<br>Dabigatran<br>Edoxaban<br>Rivaroxaban    |
|                                               | Low molecular weight heparins        | Dalteparin<br>Enoxaparin<br>Nadroparin<br>Tinzaparin |
| Nonsteroidal anti-inflammatory drugs          | N/A                                  | Celecoxib                                            |
|                                               |                                      | Diclofenac +/- misoprostol                           |
|                                               |                                      | Flurbiprofen                                         |
|                                               |                                      | Ibuprofen                                            |
|                                               |                                      | Indomethacin                                         |
|                                               |                                      | Ketoprofen                                           |
|                                               |                                      | Ketorolac                                            |
|                                               |                                      | Mefenamic acid                                       |
|                                               |                                      | Meloxicam                                            |
|                                               |                                      | Nabumetone                                           |
|                                               |                                      | Naproxen +/- esomeprazole                            |
|                                               |                                      | Oxaprozin                                            |
|                                               |                                      | Piroxicam                                            |
|                                               |                                      | Sulindac                                             |
|                                               |                                      | Tiaprofenic acid                                     |
| Acetylsalicylic acid & analgesic combinations |                                      |                                                      |
| Antiplatelet agents                           | N/A                                  | Acetylsalicylic acid & dipyridamole                  |
|                                               |                                      | Clopidogrel                                          |
|                                               |                                      | Ticlopidine                                          |
|                                               |                                      | Ticagrelor                                           |

\*Identified from ICES Drug Identification Number (DIN) Drug List by *DRUGNAME* and *DIN*; all relevant medications captured in the Ontario Drug Benefit Plan Database will be included.

†In this study, anticoagulants were grouped into 3 groups: 1) warfarin (the sole vitamin K antagonist captured), 2) direct oral anticoagulants, and 3) low molecular weight heparins).

**Supplemental Table 4. Sensitivity analysis excluding patients with recent hip or knee arthroplasty: multilevel logistic regression model for anticoagulant discontinuation\***

| Variable                                                    | Anticoagulant discontinuation<br>Odds ratio (95% CI) |
|-------------------------------------------------------------|------------------------------------------------------|
| <i>Patient characteristics</i>                              |                                                      |
| Age (continuous, older)                                     | 1.00 (0.99-1.01)                                     |
| Sex (female vs. male)                                       | 0.86 (0.78-0.96)                                     |
| Income quintile                                             |                                                      |
| First (lowest)                                              | 0.86 (0.73-1.02)                                     |
| Second                                                      | 0.96 (0.82-1.13)                                     |
| Third                                                       | 0.94 (0.80-1.11)                                     |
| Fourth                                                      | 0.97 (0.82 -1.14)                                    |
| Fifth (highest)                                             | 1.00 (Ref)                                           |
| Urban residence (vs. rural)                                 | 0.94 (0.74-1.20)                                     |
| Recent immigrant <sup>†</sup> (vs. longstanding resident)   | 0.77 (0.43-1.37)                                     |
| Index anticoagulant                                         |                                                      |
| Warfarin                                                    | 1.00 (Ref)                                           |
| Direct oral anticoagulant                                   | 0.49 (0.43-0.56)                                     |
| Low molecular weight heparin                                | 0.56 (0.47-0.66)                                     |
| Indication for anticoagulation <sup>‡</sup>                 |                                                      |
| Atrial fibrillation                                         | 0.88 (0.77-1.00)                                     |
| Venous thromboembolism                                      | 0.88 (0.75-1.02)                                     |
| Mechanical heart valve                                      | 0.73 (0.43-1.24)                                     |
| Comorbidities and risk factors <sup>‡</sup>                 |                                                      |
| Cancer                                                      | 1.11 (0.96-1.28)                                     |
| Congestive heart failure                                    | 0.95 (0.84-1.09)                                     |
| Hypertension                                                | 0.89 (0.77-1.02)                                     |
| Diabetes mellitus                                           | 0.94 (0.84-1.06)                                     |
| Prior stroke or transient ischemic attack                   | 0.93 (0.78-1.12)                                     |
| Coronary artery disease                                     | 0.94 (0.83-1.08)                                     |
| Peripheral arterial disease                                 | 1.14 (0.90-1.44)                                     |
| Renal disease                                               | 1.12 (0.99-1.27)                                     |
| Liver disease                                               | 1.16 (0.83-1.62)                                     |
| Prior bleeding <sup>§</sup>                                 | 0.98 (0.87-1.10)                                     |
| Chronic obstructive pulmonary disease                       | 1.00 (0.88-1.13)                                     |
| Dementia                                                    | 0.96 (0.79-1.16)                                     |
| NSAID or antiplatelet agent use <sup>¶</sup>                | 1.03 (0.84-1.28)                                     |
| Charlson Comorbidity Index (cont., greater)                 | 1.02 (1.00-1.04)                                     |
| <i>Physician characteristics</i>                            |                                                      |
| Sex (female vs. male)                                       | 1.07 (0.95-1.21)                                     |
| Graduation year                                             |                                                      |
| 2010 or later                                               | 1.02 (0.82-1.26)                                     |
| 2000-2009                                                   | 0.90 (0.75-1.08)                                     |
| 1990-1999                                                   | 0.90 (0.75-1.09)                                     |
| 1980-1989                                                   | 1.00 (0.83-1.19)                                     |
| 1979 or earlier                                             | 1.00 (Ref)                                           |
| Primary certification (other specialty vs. family medicine) | 1.20 (0.88-1.63)                                     |
| Urban practice (vs. rural)                                  | 0.82 (0.61-1.10)                                     |
| Palliative care specialist <sup>**</sup> (vs. generalist)   | 1.17 (1.04-1.33)                                     |

\*Multilevel logistic regression model for anticoagulant discontinuation (primary definition) including patient and physician variables. In total, 8,125 patients and 2,018 physicians were included (498 patients were excluded due to missing Charlson Comorbidity Index and 33 were excluded for both missing rural residence and income quintile). The median number of patients per physician was 1 (IQR 1-3) and the mean discontinuation rate by physician was 23.7% (95%CI 14.6-36.1). The intraclass correlation coefficient was 0.027, indicating low proportional variance in discontinuation attributable to clustering of patients by physician.

<sup>†</sup>Immigrated to Canada within 10 years prior to index date.

Appendix 1, as supplied by the authors. Appendix to: Chin-Yee N, Gomes T, Tanuseputro P, et al. Anticoagulant use and associated outcomes in older patients receiving home palliative care: a retrospective cohort study. *CMAJ* 2022. doi: 10.1503/cmaj.220919.

‡Indications for anticoagulation and baseline comorbidities/risk factors occurred prior to or on the date of the index anticoagulant claim—not the index date.

§Within 1 year prior to the index anticoagulant claim.

¶Within 6 months prior to the index anticoagulant claim.

\*\*As per Barbera et al. algorithm, in which providers are considered palliative care specialists if  $\geq 10\%$  of their claims are for palliative care services (18).

Abbreviations: CI, confidence interval; NSAID, nonsteroidal anti-inflammatory drug.

**Supplemental Table 5. Sensitivity analysis excluding patients with recent hip or knee arthroplasty: subsequent outcomes**

| Outcome                                       | Crude incidence rates                   |                  | Multivariable analysis*            |
|-----------------------------------------------|-----------------------------------------|------------------|------------------------------------|
|                                               | Incidence (95% CI) per 100 person-years |                  | Hazard ratio <sup>†</sup> (95% CI) |
|                                               | Discontinued                            | Continued        |                                    |
| Thrombotic event <sup>‡</sup>                 | 5.5 (4.3-7.0)                           | 4.9 (4.3-5.5)    | 1.06 (0.81-1.39)                   |
| Bleeding event <sup>§</sup>                   | 10.9 (9.1-12.9)                         | 12.8 (11.8-13.8) | 0.74 (0.61-0.90)                   |
| All-cause mortality                           | 142.5 (136.1-149.2)                     | 96.0 (93.5-98.6) | 1.35 (1.28-1.42)                   |
|                                               | No. (%) of patients                     |                  | Odds ratio <sup>¶</sup> (95% CI)   |
|                                               | Discontinued                            | Continued        |                                    |
| Death at home (vs. in a health care facility) | 1057 (57.8)                             | 2936 (53.9)      | 1.22 (1.09-1.36)                   |

\*Covariates included in multivariable analyses: age, sex, income quintile, rural residence, recent immigration, index anticoagulant, atrial fibrillation, prior venous thromboembolism, mechanical heart valve, cancer, congestive heart failure, hypertension, diabetes mellitus, prior stroke or transient ischemic attack, coronary artery disease, peripheral arterial disease, renal disease, liver disease, prior bleeding, chronic obstructive pulmonary disease, nonsteroidal anti-inflammatory drug or antiplatelet use, and Charlson Comorbidity Index.

<sup>†</sup>Cause-specific hazards model (n=8,125) adjusted for baseline patient characteristics. Among 8,687 patients in the study cohort, 498 patients were excluded due to missing Charlson Comorbidity Index and 33 were excluded for both missing rural residence and income quintile. In this this sensitivity analysis, 29 patients with a knee or hip arthroplasty within 30 days prior to the index anticoagulant claim were excluded. Primary discontinuation was the independent variable.

<sup>‡</sup>Hospitalization or emergency department visit with ischemic stroke, transient ischemic attack, or venous thromboembolism (see Appendix 1, Supplemental Table 2).

<sup>§</sup>Hospitalization or emergency department visit with intracranial, gastrointestinal (upper or lower), or other (primarily genitourinary and respiratory) bleeding (see Appendix 1, Supplemental Table 2).

<sup>¶</sup>Multivariable logistic regression model (n=7,276) adjusted for baseline patient characteristics. An additional 869 patients who survived beyond the study follow-up period were excluded from this model. In this this sensitivity analysis, 11 patients with a knee or hip arthroplasty within 30 days prior to the index anticoagulant claim were excluded. Primary discontinuation was the independent variable.

Abbreviations: CI, confidence interval.



## Supplemental Figure 1. Inclusion criteria and primary outcome definition for anticoagulant discontinuation\*

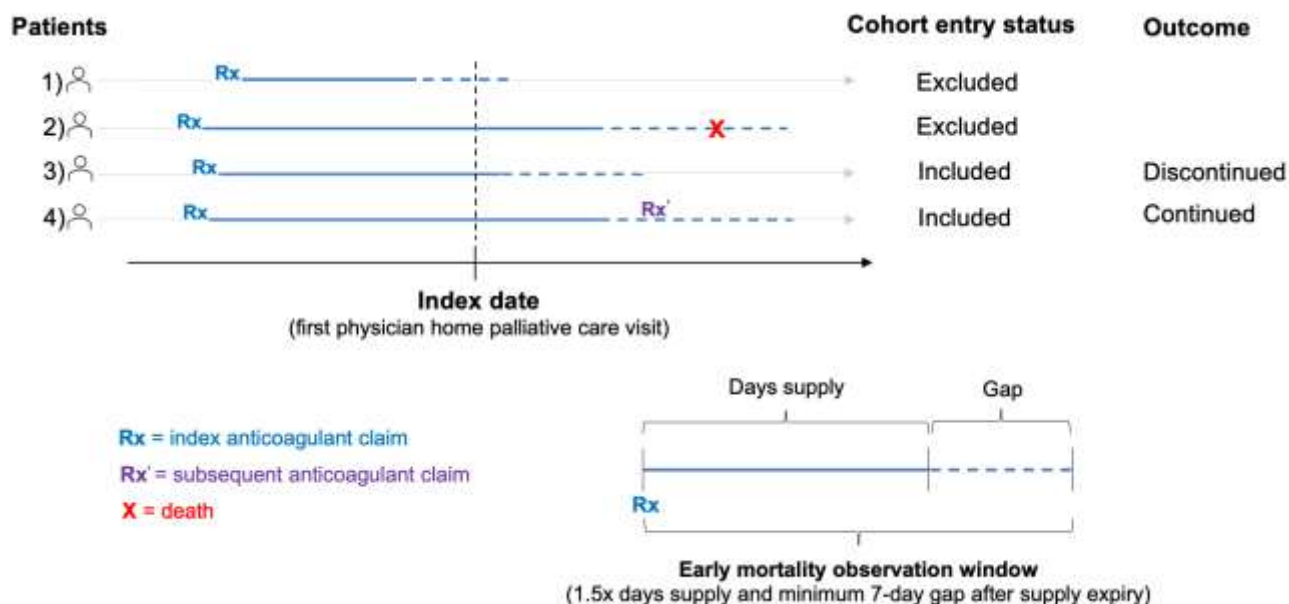

\*The cohort for the study of anticoagulant discontinuation included Ontarians  $\geq 66$  years old whose first home palliative care physician visit occurred from 2010-2018 who had an active anticoagulant prescription (remaining supply from the index anticoagulant claim) at the index date. Those who died within the early mortality observation window, defined as 1.5 times the days' supply from the date of the index anticoagulant claim with a minimum gap of 7 days after supply expiry, were excluded. Patients with no subsequent anticoagulant claim within this window were considered to have discontinued (primary definition).

## SUPPLEMENTAL REFERENCES

1. Chiu M, Lebenbaum M, Lam K, Chong N, Azimae M, Iron K, et al. Describing the linkages of the immigration, refugees and citizenship Canada permanent resident data and vital statistics death registry to Ontario's administrative health database. *BMC Med Inform Decis Mak*. 2016;16(1):1–11.
2. Yarnell CJ, Fu L, Manuel D, Tanuseputro P, Stukel T, Pinto R, et al. Association between immigrant status and end-of-life care in Ontario, Canada. *JAMA - J Am Med Assoc*. 2017;318(15):1479–88.
3. Iron K, Zagorski BM, Sykora K, Manuel D. Living and Dying in Ontario : An Opportunity for Improved Health Information. *ICES Investig Rep*. 2008;
4. Keskar V, McArthur E, Wald R, Harel Z, Zimmerman D, Molnar AO, et al. The association of anticoagulation, ischemic stroke, and hemorrhage in elderly adults with chronic kidney disease and atrial fibrillation. *Kidney Int*. 2017;
5. Lazo-Langner A, Fleet JL, McArthur E, Garg AX. Rivaroxaban vs. low molecular weight heparin for the prevention of venous thromboembolism after hip or knee arthroplasty: a cohort study. *J Thromb Haemost*. 2014 Oct;12(10):1626–35.
6. Little DHW, Sutradhar R, Cerasuolo JO, Perez R, Douketis J, Holbrook A, et al. Rates of rebleeding, thrombosis and mortality associated with resumption of anticoagulant therapy after anticoagulant-related bleeding. *Cmaj*. 2021;193(9):E304–9.
7. Benipal H, Holbrook A, Paterson JM, Douketis J, Foster G, Thabane L. Predictors of oral anticoagulant-associated adverse events in seniors transitioning from hospital to home: a retrospective cohort study protocol. *BMJ Open*. 2020;10(9):e036537.
8. Muggah E, Graves E, Bennett C, Manuel DG. The impact of multiple chronic diseases on ambulatory care use; a population based study in Ontario, Canada. *BMC Health Serv Res*. 2012 Dec;12:452.
9. Mondor L, Maxwell CJ, Hogan DB, Bronskill SE, Gruneir A, Lane NE, et al. Multimorbidity and healthcare utilization among home care clients with dementia in Ontario, Canada: A retrospective analysis of a population-based cohort. *PLOS Med*. 2017;14(3):1–17.
10. Webber C, Watt CL, Bush SH, Lawlor PG, Talarico R, Tanuseputro P. The occurrence and timing of delirium in acute care hospitalizations in the last year of life: A population-based retrospective cohort study. *Palliat Med*. 2020;34(8):1067–77.
11. Hussain MA, Al-Omran M, Salata K, Sivaswamy A, Forbes TL, Sattar N, et al. Population-based secular trends in lower-extremity amputation for diabetes and peripheral artery disease. *Can Med Assoc J*. 2019 Sep 3;191(35):E955 LP-E961.
12. Quan H, Sundararajan V, Halfon P, Fong A, Burnand B, Luthi JC, et al. Coding algorithms for defining comorbidities in ICD-9-CM and ICD-10 administrative data. *Med Care*. 2005;43(11):1130–9.
13. Charlson ME, Pompei P, Ales KL, MacKenzie CR. A new method of classifying prognostic comorbidity in longitudinal studies: Development and validation. *J Chronic Dis*. 1987;40(5):373–83.
14. Tanuseputro P, Budhwani S, Bai YQ, Wodchis WP. Palliative care delivery across health sectors: A population-level observational study. *Palliat Med*. 2017;31(3):247–57.
15. Quinn KL, Stukel T, Stall NM, Huang A, Isenberg S, Tanuseputro P, et al. Association between palliative care and healthcare outcomes among adults with terminal non-cancer illness: population based matched cohort study. *BMJ*. 2020;370.
16. Brown CRL, Hsu AT, Kendall C, Marshall D, Pereira J, Prentice M, et al. How are physicians delivering palliative care? A population-based retrospective cohort study describing the mix of generalist and specialist palliative care models in the last year of life. *Palliat Med*.

2018;32(8):1334–43.

17. Tanuseputro P, Beach S, Chalifoux M, Wodchis WP, Hsu AT, Seow H, et al. Associations between physician home visits for the dying and place of death: a population-based retrospective cohort study. *PLoS One*. 2018;13(2):e0191322.
18. Barbera L, Hwee J, Klinger C, Jembere N, Seow H, Pereira J. Identification of the physician workforce providing palliative care in Ontario using administrative claims data. *Can Med Assoc Open Access J*. 2015;3(3):E292–8.
